# Supplementary material for: Development of a Scalable Process of Film-Coated bi-Layer Tablet Containing Sustained-Release Metoprolol Succinate and Immediate-Release Amlodipine Besylate
Source: MDPI journal article supplement (doi:10.3390/pharmaceutics13111797), 2021-10-27
Supplement: s1 [file s1]

# Development of a Scalable Process of Film Coated bi-Layer Tablet Containing Sustained-Release Metoprolol Succinate and Immediate-Release Amlodipine Besylate

Nguyen Thi Linh Tuyen <sup>1,\*</sup>, Le Quan Nghiem <sup>2</sup>, Nguyen Duc Tuan <sup>2</sup> and Phuoc Huu Le <sup>3</sup>

<sup>1</sup> Faculty of Pharmacy, Can Tho University of Medicine and Pharmacy, 179 Nguyen Van Cu, Can Tho City 94000, Vietnam

<sup>2</sup> Faculty of Pharmacy, University of Medicine and Pharmacy at Ho Chi Minh City, 41 Dinh Tien Hoang Street, District 1, Ho Chi Minh City 760000, Vietnam; lequanngkiem55@gmail.com (L.Q.N.); ductuan@ump.edu.vn (N.D.T.)

<sup>3</sup> Department of Physics and Biophysics, Faculty of Basic Sciences, Can Tho University of Medicine and Pharmacy, 179 Nguyen Van Cu, Can Tho City 94000, Vietnam; lhuuphuoc@ctump.edu.vn

\* Correspondence: ntluyen@ctump.edu.vn; Tel.: +84-91-807-1943

## 1. System Suitability

**Table S1.** Mean values of chromatographic parameters and their relative standard deviation values calculated from 6 consecutive injections.  $t_R$  is retention time,  $S$  is peak area,  $A_s$  is asymmetric factor,  $R_s$  is the resolution,  $N$  is theoretical plate numbers.

| Active ingredient |                      |      | $t_R$<br>(min.) | $S$ ( $\mu$ AU x sec.) | $A_s$ | $R_s$ | $N$   |
|-------------------|----------------------|------|-----------------|------------------------|-------|-------|-------|
| Standard mixture  | Metoprolol succinate | Mean | 3.533           | 3300978                | 0.8   | -     | 16461 |
|                   |                      | RSD  | 0.12%           | 0.49%                  | 1.27% | -     | 1.79% |
|                   | Amlodipine besylate  | Mean | 5.758           | 543754                 | 1.2   | 6.0   | 24232 |
|                   |                      | RSD  | 0.59%           | 0.67%                  | 1.49% | 1.63% | 1.89% |
| Sample            | Metoprolol succinate | Mean | 3.597           | 3017171                | 0.9   | -     | 16412 |
|                   |                      | RSD  | 0.13%           | 0.10%                  | 1.08% | -     | 1.81% |
|                   | Amlodipine besylate  | Mean | 5.845           | 714285                 | 1.2   | 5.7   | 23805 |
|                   |                      | RSD  | 0.20%           | 0.21%                  | 0.87% | 0.76% | 1.76% |

## 2. The Validation of the HPLC Method

**Table S2.** Validation parameters of the analytical HPLC procedure.

| Validation characteristics       | Metoprolol succinate | Amlodipine besylate |
|----------------------------------|----------------------|---------------------|
| Linearity range ( $\mu$ g/ml)    | 40–140               | 4–14                |
| Regression coefficient ( $R^2$ ) | $R^2 = 0.9987$       | $R^2 = 0.9984$      |
| Repeatability ( $n = 6$ )        | RSD = 1.23%          | RSD = 1.21%         |
| Inter-day precision ( $n=18$ )   | RSD = 1.45%          | RSD = 1.27%         |
| Accuracy ( $n = 9, p < 0.05$ )   |                      |                     |
| Recovery (%)                     | 98.52%–101.14%       | 98.16%–99.82%       |
| RSD                              | 1.14%                | 0.63%               |

Validation results showed that the HPLC method was suitable, selective, high precision (RSD < 2%), and accuracy. Indeed, the recoveries were in the range of 98.0–102.0% of the expected values. Thus, the present procedure was applied for simultaneous determination of metoprolol succinate and amlodipine besylate.

### 3. Optimize Formulation of Film Coated Bi-Layer Tablet Containing Sustained-Release Metoprolol Succinate and Immediate-Release Amlodipine Besylate

**Table S3.** Variables in the experimental design for optimizing the drug formulation.

| Independent Variables                                                | Level 1   | Level 2   | Level 3   | Level 4   |
|----------------------------------------------------------------------|-----------|-----------|-----------|-----------|
| X1: polymer mixture (%)                                              | 35        | 40        | 45        | -         |
| X2: ratio of diluent                                                 | S:D (2:1) | S:D (1:1) | S:A (2:1) | S:A (1:1) |
| X3: hardness (kp)                                                    | 8–10      | 10–12     | -         | -         |
| <b>Dependent variables</b>                                           | Maximum   |           |           |           |
| Y1: cumulative percentage of metoprolol succinate release at 1 hour  | 0%–25%    |           |           |           |
| Y2: cumulative percentage of metoprolol succinate release at 4 hour  | 20%–40%   |           |           |           |
| Y3: cumulative percentage of metoprolol succinate release at 8 hour  | 40%–60%   |           |           |           |
| Y4: cumulative percentage of metoprolol succinate release at 20 hour | ≥ 80%     |           |           |           |

(with S – Starch 1500, D – Datab, A – Avicel).

18 formulation were designed according to D-optimal model using Design Expert software (version 6.0.6, Stat-Ease Inc., Minneapolis, USA). These formulations were summarized in Table 4.

**Table S4.** The independent variables of 18 formulations (M1–M18).

| Formula | X1  | X2        | X3       | Formula | X1  | X2        | X3       |
|---------|-----|-----------|----------|---------|-----|-----------|----------|
| M1      | 35% | S:D (2:1) | 10–12 kp | M10     | 40% | S:A (1:1) | 10–12 kp |
| M2      | 35% | S:D (2:1) | 8–10 kp  | M11     | 40% | S:A (1:1) | 8–10 kp  |
| M3      | 35% | S:A (1:1) | 10–12 kp | M12     | 40% | S:D (1:1) | 10–12 kp |
| M4      | 35% | S:D (1:1) | 10–12 kp | M13     | 45% | S:A (2:1) | 10–12 kp |
| M5      | 35% | S:A (2:1) | 8–10 kp  | M14     | 45% | S:D (2:1) | 10–12 kp |
| M6      | 35% | S:A (1:1) | 8–10 kp  | M15     | 45% | S:A (2:1) | 8–10 kp  |
| M7      | 40% | S:A (2:1) | 10–12 kp | M16     | 45% | S:A (1:1) | 10–12 kp |
| M8      | 40% | S:A (2:1) | 8–10 kp  | M17     | 45% | S:D (1:1) | 8–10 kp  |
| M9      | 40% | S:D (2:1) | 8–10 kp  | M18     | 45% | S:D (1:1) | 10–12 kp |

Where X1: % polymer mixture, X2: ratio of diluent (S - Starch 1500, D - Datab, A - Avicel), X3: hardness.

**Table S5.** The metoprolol succinate release percentage of 18 formulations (M1–M18).

| Formula | Cumulative Metoprolol Succinate Release Percentage (%) |       |       |       | Formula | Cumulative Metoprolol Succinate Release Percentage (%) |       |       |       |
|---------|--------------------------------------------------------|-------|-------|-------|---------|--------------------------------------------------------|-------|-------|-------|
|         | 1 h                                                    | 4 h   | 8 h   | 20 h  |         | 1 h                                                    | 4 h   | 8 h   | 20 h  |
| M1      | 18.96                                                  | 44.36 | 64.04 | 85.08 | M10     | 22.10                                                  | 50.20 | 70.70 | 93.09 |
| M2      | 17.03                                                  | 45.23 | 64.71 | 87.77 | M11     | 17.51                                                  | 42.59 | 61.6  | 93.18 |
| M3      | 20.33                                                  | 48.17 | 73.19 | 94.96 | M12     | 19.22                                                  | 48.88 | 71.22 | 92.31 |
| M4      | 17.21                                                  | 42.24 | 63.66 | 86.18 | M13     | 14.69                                                  | 37.08 | 54.2  | 69.87 |
| M5      | 17.96                                                  | 43.86 | 65.70 | 85.56 | M14     | 13.65                                                  | 35.61 | 52.27 | 83.93 |
| M6      | 16.33                                                  | 37.81 | 56.44 | 80.35 | M15     | 16.38                                                  | 44.27 | 63.04 | 75.02 |
| M7      | 15.84                                                  | 39.54 | 57.96 | 89.26 | M16     | 18.13                                                  | 45.03 | 63.72 | 73.95 |
| M8      | 21.29                                                  | 51.34 | 73.68 | 93.27 | M17     | 21.22                                                  | 47.05 | 63.37 | 91.97 |
| M9      | 15.89                                                  | 39.66 | 59.67 | 85.52 | M18     | 20.76                                                  | 43.69 | 65.86 | 89.78 |

The data in **Table S5** were used as the inputs for BCPharSoft OPT to optimize the formulation. The results of the accuracy of model statistics from BCPharSoft OPT outputs were presented in **Table S6**. The results show that the prediction ability of the models has good reliability. Therefore, these models could be used for multivariate optimization.

**Table S6.** Model statistical outputs obtained from BCPharSoft.

| R <sup>2</sup> | 1 h  | 4 h  | 8 h  | 20 h |
|----------------|------|------|------|------|
| Training       | 0.90 | 0.97 | 0.86 | 0.98 |
| Test           | 0.96 | 0.91 | 0.85 | 0.96 |

**Table S7.** Optimal formula predicted by BCPharSoft OPT software.

|                      | X1  | X2        | X3       |
|----------------------|-----|-----------|----------|
| Predicted parameters | 45% | S:D (2:1) | 10-12 kp |

**Table S8.** The metoprolol succinate release percentage of the optimal formulation versus the predicted formulation ( $n = 3$ ).

|           | Cumulative Metoprolol Succinate Release Percentage (%) |              |              |              |
|-----------|--------------------------------------------------------|--------------|--------------|--------------|
|           | 1 h                                                    | 4 h          | 8 h          | 20 h         |
| Predicted | 13.75                                                  | 35.53        | 52.05        | 84.03        |
| Observed  | 13.90 ± 0.73                                           | 35.22 ± 1.94 | 52.36 ± 0.85 | 85.26 ± 1.40 |
| P-values  | 0.751                                                  | 0.808        | 0.591        | 0.268        |

**Table S9.** Dissolution test of film coated bi-layer tablet of three batches.

| Active Ingredient    | Batch | Cumulative Percentage Drug Release (%) |       |       |       |       |
|----------------------|-------|----------------------------------------|-------|-------|-------|-------|
|                      |       | 30 min                                 | 1 h   | 4 h   | 8 h   | 20 h  |
| Metoprolol Succinate | 1     | -                                      | 12.78 | 35.28 | 50.43 | 87.39 |
|                      | 2     | -                                      | 14.33 | 36.32 | 53.86 | 88.31 |
|                      | 3     | -                                      | 14.36 | 34.31 | 52.07 | 85.76 |
|                      | TB    | -                                      | 13.82 | 35.30 | 52.12 | 87.15 |
|                      | RSD%  |                                        | 0.91  | 1.01  | 1.72  | 1.29  |
| Amlodipine besylate  | 1     | 96.74                                  | -     | -     | -     | -     |
|                      | 2     | 97.79                                  | -     | -     | -     | -     |
|                      | 3     | 103.43                                 | -     | -     | -     | -     |
|                      | TB    | 99.32                                  | -     | -     | -     | -     |
|                      | RSD%  | 2.97                                   |       |       |       |       |
